1 **Fadrozole-mediated sex reversal in the embryonic chicken gonad involves a PAX2 positive**  
2 **undifferentiated supporting cell state**

3 Martin A. Estermann, Craig A. Smith\*

4 Department of Anatomy and Developmental Biology, Monash Biomedicine Discovery Institute, Monash  
5 University, Clayton, VIC, 3800, Australia

6

7 **Abstract:**

8 Gonadal sex differentiation among vertebrates involves divergent fates of a common groups of  
9 progenitor cells present in both presumptive ovaries and testes. The first cell type to differentiate gives  
10 rise to pre-Sertoli cells in the testis, and pre-follicular cells in the ovary. These cells derive from a  
11 common lineage of so-called “supporting cells”. In birds and other egg-laying vertebrates, locally  
12 synthesised estrogen has a central role in ovarian development and influence the fate of these supporting  
13 cells. Manipulation of estrogen levels during embryonic development induces gonadal sex reversal,  
14 providing an experimental setting to evaluate the process of gonadal sex differentiation. Recently, we  
15 identified PAX2 as a novel marker of the undifferentiated supporting cell lineage in the chicken embryo,  
16 expressed in both sexes prior to overt gonadal sex differentiation. *PAX2* expression is downregulated  
17 at the onset of gonadal sex differentiation in both males and females. The analysis of this  
18 undifferentiated supporting cell marker, together with Sertoli (male) and pre-granulosa (female) will  
19 enhance our understanding of supporting cell differentiation. Here we characterized the supporting cells  
20 differentiation process and identified undifferentiated supporting cells in estrogen-mediated sex  
21 reversal experiments. Female embryos treated with the aromatase inhibitor fadrozole developed  
22 ovotestis, containing pre-granulosa cells, Sertoli cells and PAX2 positive undifferentiated supporting  
23 cells. In contrast, male embryos treated with 17 $\beta$ -estradiol showed no PAX2<sup>+</sup> undifferentiated gonadal  
24 supporting cells. Fadrozole time-course as well as multiple dose analysis suggests that supporting cell  
25 transdifferentiation involves a dedifferentiation event into a PAX2<sup>+</sup> undifferentiated supporting cell  
26 state, followed by a redifferentiation towards the opposite sex lineage.

27

28 **Key Words:** Fadrozole, PAX2, gonad, sex-reversal, estrogen, chicken

## 29 Introduction

30 Gonadal sex differentiation describes the process of ovary or testis formation among vertebrate  
31 embryos. In most species, the gonads differentiate during embryonic or larval life, or shortly thereafter.  
32 Among humans, gonadal and external genital differentiation are sometimes atypical. Differences of  
33 Sex Development (DSDs) in humans have an incidence of around 1% of all live births. DSDs occurs  
34 when the chromosomal, gonadal or anatomical sex are discordant or ambiguous (1, 2). Gonads exhibit  
35 a wide range of phenotypes, from total to partial sex reversal, ovotestis or gonadal dysgenesis (3). In  
36 some cases, gonads develop normally, and the external genitalia are ambiguous, as in Androgen  
37 Insensitivity (AIS) or CAH (Congenital adrenal hypoplasia) (4, 5). Despite the advances genetic  
38 diagnosis, many DSD cases lack a definitive molecular diagnosis (6). All current DSDs diagnostical  
39 methods do not provide functional information. This is crucial for understanding the etiology and risks  
40 associated with specific DSDs mutations, and for clinical management (7). In recent years, animal  
41 models have been very instructive in elucidating the molecular genetics of typical and atypical gonadal  
42 sex differentiation (8-12).

43 Comparative analysis of chicken and mouse embryos has demonstrated significant genetic and  
44 morphological conservation of gonadal sex differentiation (13, 14). As in human embryos, both chicken  
45 and mouse exhibit the same groups of progenitor cell types in the gonad. These are the supporting cells  
46 (presumptive Sertoli cells in the testis and granulosa cells in the ovary), steroidogenic cells (presumptive  
47 Leydig and theca cells), germ cells (sperm or ova) and other interstitial cells such as vascular  
48 progenitors (15-17). This conservation largely extends to the genetic level. *DMRT1*, *AMH* and *SOX9*  
49 are expressed and play decisive roles in testicular morphogenesis, while *WNT4*, *RSPO1*, *FOXL2* and  
50 *CYP19A1* (aromatase) are important in the ovary (18-21). Therefore, the chicken provides a very  
51 tractable model for studying embryonic gonad development (22, 23). In birds and other egg-laying  
52 vertebrates, locally synthesised estrogen is required for ovarian development (24-28). The estrogen  
53 synthesising enzyme, aromatase, is only expressed in female gonads at the onset of ovarian  
54 differentiation (24, 29). Experimental manipulation of estrogen levels during embryonic development  
55 has been associated with gonadal sex reversal (30, 31). Inhibition of aromatase enzyme leads to testis

56 or ovotestis formation in genetic females (29, 32-34), while over-expression in genetic males can induce  
57 transient ovary formation (35). This model provides an experimental setting to evaluate the process of  
58 gonadal sex reversal and gonadal sex diff more broadly.

59       Recently, we identified PAX2 as a novel marker of the undifferentiated supporting cell population  
60 in the embryonic chicken gonad. Furthermore, we found that PAX2 is also expressed in the  
61 undifferentiated gonads of all major avian lineages (36). In chicken, PAX2 expression is sharply  
62 downregulated at the onset of gonadal sex determination in both males and females (15, 36). The  
63 identification of this undifferentiated supporting cell marker, together with Sertoli (male) and pre-  
64 granulosa (female) markers now allows for a more complete understanding of the timing and nature of  
65 supporting cell differentiation.

66       Here we characterize the supporting cells differentiation process, and the prevalence of  
67 undifferentiated supporting cells in estrogen-mediated sex reversal experiments. Female embryos  
68 treated with the aromatase inhibitor, fadrozole, developed ovotestis, containing pre-granulosa cells,  
69 Sertoli cells and PAX2 positive undifferentiated supporting cells. In contrast, male embryos treated  
70 with 17 $\beta$ -estradiol showed no PAX2<sup>+</sup> undifferentiated gonadal supporting cells. Fadrozole time-course  
71 as well as multiple dose analysis suggests that supporting cell transdifferentiation involves a  
72 dedifferentiation phase into a PAX2<sup>+</sup> undifferentiated supporting cell state, followed by a  
73 redifferentiation towards the male (Sertoli) lineage.

74

## 75 **Materials and Methods**

### 76 **Chicken eggs**

77       Fertilized *Gallus gallus domesticus* HyLine Brown eggs were obtained from Research Poultry  
78 Farm (Victoria, Australia) and incubated at 37.5°C under humid conditions. Embryos were staged  
79 according to according to Hamburger and Hamilton (37). Experiments were performed in accordance  
80 with our institutional animal ethics requirements (Approved Monash University AEC #17643).

81

### 82 **Fadrozole treatment**

83 Eggs were injected at E3.5 (Hamburger and Hamilton stage HH19) (37) with 1mg of fadrozole  
84 (Novartis) in 100  $\mu$ L of PBS or vehicle, as described previously (38). Embryonic urogenital systems  
85 were collected at E6.5 (HH30), E9.5 (HH35) or E12.5 (HH38). For double injection experiments, eggs  
86 were injected at E3.5 and at E6.5 with 1 mg of fadrozole in 100  $\mu$ l of PBS or vehicle. Tissues were  
87 collected at E9.5.

88

### 89 **17 $\beta$ -estradiol treatment**

90 Eggs were injected at E3.5 (HH19) with 0.1 mg of 17 $\beta$ -estradiol in 10% ethanol in sesame oil or  
91 vehicle, as described previously (38). Tissues were collected at E9.5 (HH35).

92

### 93 **Sexing PCR**

94 Genetic sexing was performed by PCR, as described previously (39). Genetic females  
95 (chromosomally ZW) were identified by the presence of a female-specific (W-linked) XhoI repeat  
96 sequence in addition to a 18S ribosomal gene internal control. Genetic males (chromosomally ZZ)  
97 showed the 18S band only (39).

98

### 99 **qRT-PCR**

100 Quantitative RT-PCR (qRT-PCR) was performed as reported before (36). Briefly, E9.5 (HH35)  
101 gonadal pairs were collected and snap frozen in dry ice. After PCR sexing, 3 same-sex gonadal pairs  
102 from the same treatment were pooled for each sample, homogenized and RNA extracted using 1mL  
103 TRIzol as per the manufacturer's instructions, (TRIzol, ThermoFisher). Genomic DNA was removed  
104 using DNA-free<sup>TM</sup> DNA Removal Kit (Invitrogen) and 1  $\mu$ g of total RNA was reversed transcribed into  
105 cDNA using Promega Reverse Transcription System (A3500). RT-qPCR was performed using the  
106 QuantiNova SYBR<sup>®</sup> Green PCR Kit. *PAX2* expression levels were quantified by the  $2^{-\Delta\Delta C_t}$  method  
107 using  $\beta$ -actin as internal control. PCR primers were: *PAX2* Fw: GGCGAGAAGAGGAAACGTGA,  
108 *PAX2* Rv: GAAGGTGCTTCCGCAAACCTG,  *$\beta$ -actin* Fw: CTCTGACTGACCGCGTTACT and  *$\beta$ -*  
109 *actin* Rv: TACCAACCATCACACCCTGAT. Data was analysed using two-way ANOVA.  
110 Significance was determined using Tukey posttest.

111

## 112 **Immunofluorescence**

113 Immunofluorescence of frozen sections was performed as reported previously (15). Briefly,  
114 gonadal samples were fixed in 4% paraformaldehyde/PBS for 15 minutes, cryoprotected in 30% sucrose  
115 in PBS overnight, embedded in OCT embedding compound and snap frozen at -80°C. 10µm gonadal  
116 cryosections were permeabilized with 1% Triton X-100 in 1X PBS for 10 minutes, blocked in 2% BSA  
117 in 1X PBS for 1 hour, incubated overnight at 4°C with the primary antibody in 1% BSA in 1X PBS.  
118 Primary antibodies used: rabbit anti-PAX2 (Biolegend 901001, 1;500), rabbit anti-DMRT1 (in house  
119 antibody; 1:2000), rabbit anti-SOX9 (Millipore AB5535, 1:4000), rabbit anti-Aromatase (in house  
120 antibody; 1:4000) and rabbit anti-AMH (Abexa ABX132175; 1:1000). Samples were washed and  
121 incubated with the secondary antibody Alexa Fluor 488 donkey anti-rabbit (1:1000) in 1% BSA in 1X  
122 PBS. Samples were counterstained with DAPI and mounted in Fluorsave (Millipore). Images were  
123 collected on a Zeiss Axio Imager A1 microscope using a Zeiss Axiocam MRc5 camera, using the same  
124 exposure time between treatments for expression comparisons. For PAX2 immunostaining, antigen  
125 retrieval was performed using the Dako PT Link automated system.

126

## 127 **Results**

### 128 *PAX2 expression is induced upon fadrozole mediated masculinization*

129 In the chicken embryos, a typical genetic female develops a large ovary, characterised by thickened  
130 outer cortex and vacuolated underlying medulla (32, 33). Treatment with a single dose of the aromatase  
131 inhibitor Fadrozole results in gonads lacking a cortex and developing testicular cords rather than lacuna  
132 in the medulla (33). Here, embryonic day 3.5 (E3.5) chicken eggs were injected with the Fadrozole or  
133 vehicle solution (Fig. 1A). Embryos were collected at E9.5 (Fig. 1A), genotypically sexed and *PAX2*  
134 gonadal mRNA expression was measured by qRT-PCR. *PAX2* mRNA levels were significantly higher  
135 in females treated with fadrozole (FAD), compared with the vehicle control (Fig. 1B).

136 In males, *PAX2* expression levels remained unchanged upon treatment (Fig. 1B). To validate the  
137 qRT-PCR results, immunofluorescence against *PAX2*, aromatase (female marker) and male markers

138 SOX9 and DMRT1 was performed in E9.5 female (ZW) gonads treated with fadrozole (FAD) or vehicle  
139 (Control). As expected, control left ovaries were larger, expressing aromatase in the medulla but no  
140 PAX2, SOX9 or DMRT1 (Fig. 1C). In contrast, fadrozole-treated female left gonads lacked a cortical  
141 compartment, and both male (SOX9) and female (aromatase) positive supporting cells co-existed in the  
142 same gonad, but in separated defined regions (Fig. 1C). Aromatase positive cells were located in the  
143 apical region of the gonad whereas SOX9 positive cells were detected more basally, adjacent to the  
144 the mesonephric kidney. Testis-associate DMRT1 was up-regulated throughout the medulla. PAX2<sup>+</sup>  
145 cells were identified in the gonadal medulla, between SOX9 and aromatase positive supporting cells  
146 (Fig. 1C). Taking all together, these results indicate that fadrozole mediated masculinization results in  
147 an increase in gonadal PAX2<sup>+</sup> expression among cells of the female gonad. Based on our previous data,  
148 showing PAX2 to be a marker of prior to differentiation, these cells are interpreted to be undifferentiated  
149 supporting cells.

150

151 *PAX2 expression is not induced upon estrogen-induced feminization*

152 To evaluate if PAX2 positive undifferentiated cells were also present in estradiol-mediated male  
153 to female sex reversed gonads, E3.5 chicken eggs were injected with 17 $\beta$ -estradiol (E2) or vehicle  
154 solution (Fig. 2A). Embryos were collected at E9.5 (Fig. 2A), genotypically sexed and PAX2 expression  
155 was measured by qRT-PCR. No significant differences were found in PAX2 mRNA expression levels,  
156 between treated (E2) and control gonads in both sexes (Fig. 2B). PAX2 Immunofluorescence was  
157 performed on E9.5 male (ZZ) gonads treated with 17 $\beta$ -estradiol or vehicle, but no PAX2 positive cells  
158 were detected in the gonadal medulla (Fig. 2C), consistent with the qRT-PCR results. To evaluate if, in  
159 fact, the gonads were sex reversed, aromatase, SOX9 and DMRT1 protein expression were evaluated  
160 by immunofluorescence. As expected, control male gonads showed no aromatase expression and  
161 medullary expression of SOX9 and DMRT1 (Fig. 2C). In contrast, E2 treated gonads showed higher  
162 ectopic activation of aromatase and lower levels of the male markers, SOX9 and DMRT1 in the medulla  
163 (Fig. 2C). Additionally, DMRT1 positive germ cells were detected in the cortical region of the gonad,  
164 as is seen in typical left ovaries. These results indicate that 17 $\beta$ -estradiol mediated sex reversal did not  
165 induce PAX2 positive undifferentiated supporting cells at E9.5.

166 *PAX2 expression is not altered in E6.5 and E12.5 in fadrozole mediated masculinization*

167 To evaluate if fadrozole treatment in ZW embryos resulted in an increase of undifferentiated  
168 supporting cells throughout gonadal development, fadrozole was injected in E3.5 eggs and gonads were  
169 collected at E6.5 and E12.5 (Fig. 3A). Samples were genetically sexed and ZW gonads were  
170 immunostained for male (SOX9 and DMRT1), female (aromatase) and undifferentiated (PAX2)  
171 supporting cell markers. At E6.5, PAX2 was detected in both control and FAD-treated embryos. Some  
172 numbers of Aromatase<sup>+</sup> cells were also detected, indicating the onset of ovarian differentiation.  
173 However, the testis determining factor DMRT1, showed clear upregulation in the female gonad treated  
174 with fadrozole aromatase inhibitor. By E12.5, PAX2 expression had been extinguished suggesting that  
175 by this developmental stage, all the supporting cells committed to a pre-granulosa or Sertoli cell fate  
176 (Fig. 3C). Control gonads showed a typical ovarian structure, with aromatase<sup>+</sup> vacuolated medulla and  
177 an enlarged cortex, containing DMRT1 positive germ cells, and an aromatase positive medulla (Fig.  
178 3C). As expected, E12.5 fadrozole treated gonads lacked a properly defined cortex (Fig. 3C). Aromatase  
179 positive pre-granulosa cells located extensively throughout the gonad, whereas SOX9<sup>+</sup> DMRT1<sup>+</sup>,  
180 presumably Sertoli cells, are in the basal region of the gonad (Fig. 3C (Fig. 1C)). This data suggests that  
181 by E12.5, fadrozole treated gonads at E3.5 reverted to an ovarian phenotype.

182

183 *PAX2 undifferentiated supporting cells are lost upon booster injection of fadrozole*

184 As fadrozole treatment at E3.5 only results in changes in PAX2 expression pattern at E9.5, but not  
185 in E6.5 or E12.5, we wanted to know if those PAX2 undifferentiated cells were a consequence of  
186 fadrozole decay over time. To address this question, a double dose experiment was performed, where  
187 eggs were injected at E3.5 and E6.5 with vehicle solution (control) or fadrozole, generating 4 different  
188 conditions (Fig. 4A). Embryos were collected at E9.5 and immunofluorescence for AMH, SOX9,  
189 DMRT1, PAX2 and aromatase was performed (Fig. 4B). As expected, control ovaries expressed  
190 aromatase but no PAX2, SOX9, DMRT1 or AMH. Similar to the results from figure 1C, a single dose  
191 of fadrozole at E3.5 resulted in gonads expressing male supporting markers (DMRT1, SOX9, AMH),  
192 female markers (aromatase) and undifferentiated PAX2 positive cells (Fig. 4B). In contrast, single dose  
193 of fadrozole at E6.5 resulted in no PAX2 expression in the gonads, but both Sertoli and pre-granulosa

194 cells coexisting in the gonadal medulla (Fig. 4B). These results indicate that PAX2 upregulation is not  
195 a direct result of fadrozole treatment, and that the timing of fad administration is important. Moreover,  
196 a similar phenotype was seen in gonads treated with double doses of fadrozole at E3.5 and E6.5 (Fig.  
197 4B). Despite both male and female markers coexisted in the gonadal mesenchyme, no PAX2 expression  
198 was detected (Fig. 4B). This suggests that despite one dose at E3.5 results in PAX2 expression, a booster  
199 dose at E6.5 inhibits PAX2 expression at E9.5. Taking all together, these results suggests that the  
200 undifferentiated supporting cells present at E9.5 are not a direct result of fadrozole injection. Instead,  
201 this PAX2 undifferentiated population could be a result of the decay or metabolism of fadrozole at E9.5.  
202 The lack of PAX2 positive cells in the gonadal medulla when a booster dose of fadrozole is injected  
203 E6.5 supports with this idea. The lack of functional fadrozole at E9.5 results in disinhibition of  
204 aromatase and the production of estrogen. Estrogen then could induce the differentiation into pre-  
205 granulosa cells while inhibiting Sertoli differentiation. The upregulation of PAX2 suggests that Sertoli  
206 to pre-granulosa trans-differentiation involves a dedifferentiation into undifferentiated PAX2<sup>+</sup>  
207 supporting cells, followed by a redifferentiation towards pre-granulosa cells.

208

## 209 **Discussion**

210 Gonadal sex reversal occurs when there is a discordance between the genetic/chromosomal and  
211 gonadal sex (40). Despite the genetic sex is determined at fertilization, the gonads are sexually  
212 determined later during embryonic development (6, 41). Initially, both male and female gonads develop  
213 similarly (42). These undifferentiated gonads have the potential of becoming a testis or an ovary,  
214 depending on the genetic or environmental signals they receive (43). Among the genetic signals, sex  
215 chromosome linked genes like *SRY* in humans or *DMRT1* in birds are sufficient and necessary for  
216 testicular development (44-46). Misexpression of those genes in chromosomal females results in  
217 testicular development (19, 47). Additionally, *SRY* translocation from the Y to the X chromosome  
218 during male meiosis is the cause of the majority of the 46,XX DSD cases (48).

219 Among the estrogen plays a strong role in ovarian differentiation. Modulation of estrogen levels  
220 resulted in gonadal feminization in birds, reptiles, and eutherian mammals (25, 29, 31, 49-51). In



221 placental mammals such as mice, estrogen seems to have a role in gonadal maintenance, as estrogen  
222 receptor  $\alpha$  and  $\beta$  double knock out result in postnatal gonadal sex reversal (52). In birds, exogenous  
223 modulation of estrogen levels can influence the embryonic gonadal fate, independent of the genetic sex.  
224 Injection of fadrozole, an estrogen synthesis inhibitor, in female embryos results in testicular  
225 development, upregulating *DMRT1* and *AMH* and downregulating *FOXL2* and *aromatase* (29, 34, 38,  
226 53). In some cases, these gonads reverted to ovotestis, upregulating *aromatase* at around day 7 to 9 of  
227 development (32, 38, 54). Our results agree with these reports, showing both *aromatase* and *SOX9*  
228 expression in the same gonads at E9.5 and E12.5, upon fadrozole treatment (Fig. 1C and 3C).  
229 Surprisingly, *aromatase*-expressing embryonic pre-granulosa cells were confined to the apical region  
230 of the gonad whereas the *SOX9* positive Sertoli cells were present at the base of the gonad, suggesting  
231 that some cell populations are more susceptible to redifferentiation. Two main Sertoli cell types were  
232 identified in chicken embryonic testis (15). One population located in the most apical region of the  
233 gonad expressing low levels of Sertoli markers *SOX9* and *DMRT1*, and the other located more basally,  
234 expressing higher levels of *SOX9* and *DMRT1* (15). *DMRT1* is required to maintain the Sertoli cell  
235 identity in testis (46, 55, 56). Lower *DMRT1* expression in the apical region could explain the higher  
236 susceptibility of these supporting cells to transdifferentiate. On the other hand, a higher sensitivity to  
237 estrogens could be also responsible to this phenomenon, although this remains unexplored. Further  
238 research is required to evaluate why the apical supporting cell population is more sensitive to  
239 transdifferentiation than the basal one.

240 The process of supporting cell re-differentiation coincides with the upregulation of *PAX2* in the  
241 gonads, a marker only expressed in undifferentiated supporting cells (15, 36). This suggests that Sertoli  
242 cells should revert into a more undifferentiated or bipotential state before they re-differentiate into pre-  
243 granulosa cells. These *PAX2*<sup>+</sup> “undifferentiated” supporting cells are located in between the *SOX9*<sup>+</sup>  
244 Sertoli and the *aromatase* positive pre-granulosa cells. In transdifferentiating adult murine gonads, cells  
245 expressing both *FOXL2* and *SOX9* are detected, suggesting the presence of intermediate double  
246 positive cell states (55). Further research is required to confirm that if in fact these are three independent  
247 populations or if double or triple positive cells are detected. *PAX2*, *SOX9* and *aromatase* or *FOXL2*  
248 immunolabelling in the same gonadal sections will be crucial to address these inquiries.

249 It is curious that PAX2 was upregulated only during fadrozole mediated but not in estrogen  
250 mediated sex reversal. This could suggest that female to male sex reversal occurs differently than male  
251 to female sex reversal, perhaps due to the early elevated expression of DMRT1 in males that prevents  
252 such de-differentiation. Another possibility is that we missed the PAX2 expression / undifferentiated  
253 window in our time series. In fadrozole mediated sex reversal, PAX2 was differentially expressed at  
254 E9.5 but not at E6.5 or E12.5. This suggests that this process occurs only at a short period of time. Only  
255 E9.5 gonads were evaluated in 17 $\beta$ -estradiol mediated sex reversal. Further research should expand our  
256 analysis to other embryonic stages before and after E9.5 to elucidate if pre-granulosa to Sertoli re-  
257 differentiation also involves an undifferentiated PAX2<sup>+</sup> state. Similarly, intermediate states between  
258 E6.5 and E12.5 in fadrozole mediated sex reversal are required to precisely define the timeframe of this  
259 dedifferentiation and redifferentiation process. This would expand our knowledge in this poorly studied  
260 mechanism.

261 The chicken model is an ideal system to study genetic, environmental, and hormonal factors that  
262 control normal or abnormal gonadal differentiation. Estrogenic mediated sex reversal provides a  
263 valuable tool to model and study DSDs, especially partial sex reversion and ovotestis development.

264

265 **Acknowledgments:** The authors acknowledge use of the facilities and technical assistance of  
266 Monash Histology Platform, Department of Anatomy and Developmental Biology, Monash University.

267

268 **Correspondence:** Craig A. Smith, Department of Anatomy and Developmental Biology, Monash  
269 Biomedicine Discovery Institute, Monash University, Clayton, VIC, 3800, Australia. E-mail:  
270 [craig.smith@monash.edu](mailto:craig.smith@monash.edu)

271 **Disclosure Statement:** The authors have nothing to disclose.

272 **Data Availability:** All data generated or analysed during this study are included in this published  
273 article.

274 **Financial Support:** This research was supported by the Australian Research Council (Discovery  
275 Grant No. DP200100709) and Monash University Postgraduate Publication Award.

276

## 277 **References**

- 278 1. Vilain E. The genetics of ovotesticular disorders of sex development. *Adv Exp Med*  
279 *Biol.* 2011;707:105-6.
- 280 2. Eggers S, Sadedin S, van den Bergen JA, Robevska G, Ohnesorg T, Hewitt J, et al.  
281 Disorders of sex development: insights from targeted gene sequencing of a large international  
282 patient cohort. *Genome Biol.* 2016;17(1):243.
- 283 3. Gomes NL, Chetty T, Jorgensen A, Mitchell RT. Disorders of Sex Development-Novel  
284 Regulators, Impacts on Fertility, and Options for Fertility Preservation. *Int J Mol Sci.*  
285 2020;21(7).
- 286 4. Tadokoro-Cuccaro R, Hughes IA. Androgen insensitivity syndrome. *Curr Opin*  
287 *Endocrinol Diabetes Obes.* 2014;21(6):499-503.
- 288 5. Singh RJ. Quantitation of 17-OH-progesterone (OHPG) for diagnosis of congenital  
289 adrenal hyperplasia (CAH). *Methods Mol Biol.* 2010;603:271-7.
- 290 6. Estermann MA, Smith CA. Applying Single-Cell Analysis to Gonadogenesis and  
291 DSDs (Disorders/Differences of Sex Development). *Int J Mol Sci.* 2020;21(18).
- 292 7. Barseghyan H, Delot EC, Vilain E. New technologies to uncover the molecular basis  
293 of disorders of sex development. *Mol Cell Endocrinol.* 2018;468:60-9.
- 294 8. Gonen N, Futtner CR, Wood S, Garcia-Moreno SA, Salamone IM, Samson SC, et al.  
295 Sex reversal following deletion of a single distal enhancer of Sox9. *Science.*  
296 2018;360(6396):1469-73.
- 297 9. Croft B, Ohnesorg T, Hewitt J, Bowles J, Quinn A, Tan J, et al. Human sex reversal is  
298 caused by duplication or deletion of core enhancers upstream of SOX9. *Nat Commun.*  
299 2018;9(1):5319.
- 300 10. Robevska G, van den Bergen JA, Ohnesorg T, Eggers S, Hanna C, Hersmus R, et al.  
301 Functional characterization of novel NR5A1 variants reveals multiple complex roles in  
302 disorders of sex development. *Hum Mutat.* 2018;39(1):124-39.
- 303 11. Sutton E, Hughes J, White S, Sekido R, Tan J, Arboleda V, et al. Identification of SOX3  
304 as an XX male sex reversal gene in mice and humans. *J Clin Invest.* 2011;121(1):328-41.
- 305 12. Garcia-Acero M, Moreno O, Suarez F, Rojas A. Disorders of Sexual Development:  
306 Current Status and Progress in the Diagnostic Approach. *Curr Urol.* 2020;13(4):169-78.
- 307 13. Ayers KL, Smith CA, Lambeth LS. The molecular genetics of avian sex determination  
308 and its manipulation. *Genesis.* 2013;51(5):325-36.
- 309 14. Ayers KL, Lambeth LS, Davidson NM, Sinclair AH, Oshlack A, Smith CA.  
310 Identification of candidate gonadal sex differentiation genes in the chicken embryo using RNA-  
311 seq. *BMC Genomics.* 2015;16:704.
- 312 15. Estermann MA, Williams S, Hirst CE, Roly ZY, Serralbo O, Adhikari D, et al. Insights  
313 into Gonadal Sex Differentiation Provided by Single-Cell Transcriptomics in the Chicken  
314 Embryo. *Cell Rep.* 2020;31(1):107491.
- 315 16. Mayere C, Regard V, Perea-Gomez A, Bunce C, Neirijnck Y, Djari C, et al. Origin,  
316 specification and differentiation of a rare supporting-like lineage in the developing mouse  
317 gonad. *Sci Adv.* 2022;8(21):eabm0972.
- 318 17. Garcia-Alonso L, Lorenzi V, Mazzeo CI, Alves-Lopes JP, Roberts K, Sancho-Serra C,  
319 et al. Single-cell roadmap of human gonadal development. *Nature.* 2022;607(7919):540-7.

- 320 18. Cutting A, Chue J, Smith CA. Just how conserved is vertebrate sex determination? *Dev*  
321 *Dyn.* 2013;242(4):380-7.
- 322 19. Lambeth LS, Raymond CS, Roeszler KN, Kuroiwa A, Nakata T, Zarkower D, et al.  
323 Over-expression of DMRT1 induces the male pathway in embryonic chicken gonads. *Dev Biol.*  
324 2014;389(2):160-72.
- 325 20. Smith CA, Sinclair AH. Sex determination: insights from the chicken. *Bioessays.*  
326 2004;26(2):120-32.
- 327 21. Ayers KL, Sinclair AH, Smith CA. The molecular genetics of ovarian differentiation  
328 in the avian model. *Sex Dev.* 2013;7(1-3):80-94.
- 329 22. Morrish BC, Sinclair AH. Vertebrate sex determination: many means to an end.  
330 *Reproduction.* 2002;124(4):447-57.
- 331 23. DeFalco T, Capel B. Gonad morphogenesis in vertebrates: divergent means to a  
332 convergent end. *Annu Rev Cell Dev Biol.* 2009;25:457-82.
- 333 24. Smith CA, Andrews JE, Sinclair AH. Gonadal sex differentiation in chicken embryos:  
334 expression of estrogen receptor and aromatase genes. *J Steroid Biochem Mol Biol.* 1997;60(5-  
335 6):295-302.
- 336 25. Pieau C, Dorizzi M. Oestrogens and temperature-dependent sex determination in  
337 reptiles: all is in the gonads. *J Endocrinol.* 2004;181(3):367-77.
- 338 26. Brunstrom B, Axelsson J, Mattsson A, Halldin K. Effects of estrogens on sex  
339 differentiation in Japanese quail and chicken. *Gen Comp Endocrinol.* 2009;163(1-2):97-103.
- 340 27. Barske LA, Capel B. Estrogen represses SOX9 during sex determination in the red-  
341 eared slider turtle *Trachemys scripta*. *Dev Biol.* 2010;341(1):305-14.
- 342 28. Guiguen Y, Fostier A, Piferrer F, Chang CF. Ovarian aromatase and estrogens: a pivotal  
343 role for gonadal sex differentiation and sex change in fish. *Gen Comp Endocrinol.*  
344 2010;165(3):352-66.
- 345 29. Elbrecht A, Smith RG. Aromatase enzyme activity and sex determination in chickens.  
346 *Science.* 1992;255(5043):467-70.
- 347 30. Shioda K, Odajima J, Kobayashi M, Kobayashi M, Cordazzo B, Isselbacher KJ, et al.  
348 Transcriptomic and Epigenetic Preservation of Genetic Sex Identity in Estrogen-feminized  
349 Male Chicken Embryonic Gonads. *Endocrinology.* 2021;162(1).
- 350 31. Guioli S, Zhao D, Nandi S, Clinton M, Lovell-Badge R. Oestrogen in the chick embryo  
351 can induce chromosomally male ZZ left gonad epithelial cells to form an ovarian cortex that  
352 can support oogenesis. *Development.* 2020;147(4).
- 353 32. Vaillant S, Dorizzi M, Pieau C, Richard-Mercier N. Sex reversal and aromatase in  
354 chicken. *J Exp Zool.* 2001;290(7):727-40.
- 355 33. Vaillant S, Magre S, Dorizzi M, Pieau C, Richard-Mercier N. Expression of AMH,  
356 SF1, and SOX9 in gonads of genetic female chickens during sex reversal induced by an  
357 aromatase inhibitor. *Dev Dyn.* 2001;222(2):228-37.
- 358 34. Smith CA, Katz M, Sinclair AH. DMRT1 is upregulated in the gonads during female-  
359 to-male sex reversal in ZW chicken embryos. *Biol Reprod.* 2003;68(2):560-70.
- 360 35. Lambeth LS, Morris KR, Wise TG, Cummins DM, O'Neil TE, Cao Y, et al. Transgenic  
361 Chickens Overexpressing Aromatase Have High Estrogen Levels but Maintain a  
362 Predominantly Male Phenotype. *Endocrinology.* 2016;157(1):83-90.
- 363 36. Estermann MA, Mariette MM, Moreau JLM, Combes AN, Smith CA. PAX2 (+)  
364 Mesenchymal Origin of Gonadal Supporting Cells Is Conserved in Birds. *Front Cell Dev Biol.*  
365 2021;9(2373):735203.
- 366 37. Hamburger V, Hamilton HL. A series of normal stages in the development of the chick  
367 embryo. *J Morphol.* 1951;88(1):49-92.

- 368 38. Estermann MA, Hirst CE, Major AT, Smith CA. The homeobox gene TGIF1 is required  
369 for chicken ovarian cortical development and generation of the juxtacortical medulla.  
370 *Development*. 2021;148(16).
- 371 39. Clinton M, Haines L, Belloir B, McBride D. Sexing chick embryos: a rapid and simple  
372 protocol. *Br Poult Sci*. 2001;42(1):134-8.
- 373 40. Du X, Zhang X, Li Y, Han Y. 46,XY female sex reversal syndrome with bilateral  
374 gonadoblastoma and dysgerminoma. *Exp Ther Med*. 2014;8(4):1102-4.
- 375 41. Wilhelm D, Palmer S, Koopman P. Sex determination and gonadal development in  
376 mammals. *Physiol Rev*. 2007;87(1):1-28.
- 377 42. Nef S, Stevant I, Greenfield A. Characterizing the bipotential mammalian gonad. *Curr*  
378 *Top Dev Biol*. 2019;134:167-94.
- 379 43. Nagahama Y, Chakraborty T, Paul-Prasanth B, Ohta K, Nakamura M. Sex  
380 determination, gonadal sex differentiation, and plasticity in vertebrate species. *Physiol Rev*.  
381 2021;101(3):1237-308.
- 382 44. Koopman P. Sry and Sox9: mammalian testis-determining genes. *Cell Mol Life Sci*.  
383 1999;55(6-7):839-56.
- 384 45. Jager RJ, Anvret M, Hall K, Scherer G. A human XY female with a frame shift mutation  
385 in the candidate testis-determining gene SRY. *Nature*. 1990;348(6300):452-4.
- 386 46. Smith CA, Roeszler KN, Ohnesorg T, Cummins DM, Farlie PG, Doran TJ, et al. The  
387 avian Z-linked gene DMRT1 is required for male sex determination in the chicken. *Nature*.  
388 2009;461(7261):267-71.
- 389 47. Koopman P, Gubbay J, Vivian N, Goodfellow P, Lovell-Badge R. Male development  
390 of chromosomally female mice transgenic for Sry. *Nature*. 1991;351(6322):117-21.
- 391 48. Ohnesorg T, Vilain E, Sinclair AH. The genetics of disorders of sex development in  
392 humans. *Sex Dev*. 2014;8(5):262-72.
- 393 49. Milnes MR, Jr., Roberts RN, Guillette LJ, Jr. Effects of incubation temperature and  
394 estrogen exposure on aromatase activity in the brain and gonads of embryonic alligators.  
395 *Environ Health Perspect*. 2002;110 Suppl 3:393-6.
- 396 50. Lambeth LS, Cummins DM, Doran TJ, Sinclair AH, Smith CA. Overexpression of  
397 aromatase alone is sufficient for ovarian development in genetically male chicken embryos.  
398 *PLoS One*. 2013;8(6):e68362.
- 399 51. Coveney D, Shaw G, Renfree MB. Estrogen-induced gonadal sex reversal in the  
400 tammar wallaby. *Biol Reprod*. 2001;65(2):613-21.
- 401 52. Couse JF, Hewitt SC, Bunch DO, Sar M, Walker VR, Davis BJ, et al. Postnatal sex  
402 reversal of the ovaries in mice lacking estrogen receptors alpha and beta. *Science*.  
403 1999;286(5448):2328-31.
- 404 53. Hirst CE, Major AT, Ayers KL, Brown RJ, Mariette M, Sackton TB, et al. Sex Reversal  
405 and Comparative Data Undermine the W Chromosome and Support Z-linked DMRT1 as the  
406 Regulator of Gonadal Sex Differentiation in Birds. *Endocrinology*. 2017;158(9):2970-87.
- 407 54. Nishikimi H, Kansaku N, Saito N, Usami M, Ohno Y, Shimada K. Sex differentiation  
408 and mRNA expression of P450c17, P450arom and AMH in gonads of the chicken. *Mol Reprod*  
409 *Dev*. 2000;55(1):20-30.
- 410 55. Matson CK, Murphy MW, Sarver AL, Griswold MD, Bardwell VJ, Zarkower D.  
411 DMRT1 prevents female reprogramming in the postnatal mammalian testis. *Nature*.  
412 2011;476(7358):101-4.
- 413 56. Ioannidis J, Taylor G, Zhao D, Liu L, Idoko-Akoh A, Gong D, et al. Primary sex  
414 determination in birds depends on DMRT1 dosage, but gonadal sex does not determine adult  
415 secondary sex characteristics. *Proc Natl Acad Sci U S A*. 2021;118(10).

## 418 **Figure legends**

419 **Fig 1. PAX2 expression is induced upon fadrozole mediated masculinization.** (A) Schematic  
420 figure of the experimental plan. Fadrozole or vehicle solution was injected in chicken eggs at E3.5.  
421 Samples were collected at E9.5. (B) *PAX2* qRT-PCR was performed in E9.5 gonadal samples of  
422 fadrozole (FAD) or vehicle (Control) treated embryos. Expression level is relative to  $\beta$ -actin and  
423 normalized to the male control. Bars represent mean $\pm$ s.e.m., n=6. \* adjusted P<0.05. 2-way ANOVA  
424 and Tukey's post-test. (C) Immunofluorescence against PAX2, aromatase, SOX9 and DMRT1 in E9.5  
425 female (ZW) gonads treated with fadrozole (FAD) or vehicle solution (Control). White arrows indicate  
426 positive cells.

427  
428 **Fig 2. PAX2 expression is not induced upon estrogen-induced feminization.** (A) Schematic  
429 figure of the experimental plan. 17 $\beta$ -estradiol or vehicle solution was injected in chicken eggs at E3.5.  
430 Samples were collected at E9.5. (B) *PAX2* qRT-PCR was performed in E9.5 gonadal samples of 17 $\beta$ -  
431 estradiol (E2) or vehicle (Control) treated embryos. Expression level is relative to  $\beta$ -actin and  
432 normalized to the male control. Bars represent mean $\pm$ s.e.m., n=6. 2-way ANOVA and Tukey's post-  
433 test. (C) Immunofluorescence against PAX2, aromatase, SOX9 and DMRT1 in E9.5 male (ZZ) gonads  
434 treated with 17 $\beta$ -estradiol (E2) or vehicle solution (Control). White arrows indicate positive cells.

435  
436 **Fig 3. PAX2 expression is not altered in E6.5 and E12.5 in fadrozole mediated**  
437 **masculinization.** (A) Schematic figure of the experimental plan. Fadrozole or vehicle solution was  
438 injected in chicken eggs at E3.5. Samples were collected at E6.5 or E12.5. (B) Immunofluorescence  
439 against PAX2, aromatase, SOX9 and DMRT1 in E6.5 female (ZW) gonads treated with fadrozole  
440 (FAD) or vehicle solution (Control). (C) Immunofluorescence against PAX2, aromatase, SOX9 and  
441 DMRT1 in E12.5 female (ZW) gonads treated with fadrozole (FAD) or vehicle solution (Control).  
442 White arrows indicate positive cells.

443

444           **Fig 4. PAX2 undifferentiated supporting cells are lost upon booster injection of fadrozole.**  
445       (A) Schematic figure of the experimental plan. Fadrozole or vehicle solution was injected in chicken  
446       eggs at E3.5 and E6.5. Samples were collected at E9.5. (B) Immunofluorescence against PAX2,  
447       aromatase, SOX9 and DMRT1 and AMH in E9.5 female (ZW) gonads treated with fadrozole or vehicle  
448       solution (Control). White arrows indicate positive cells.

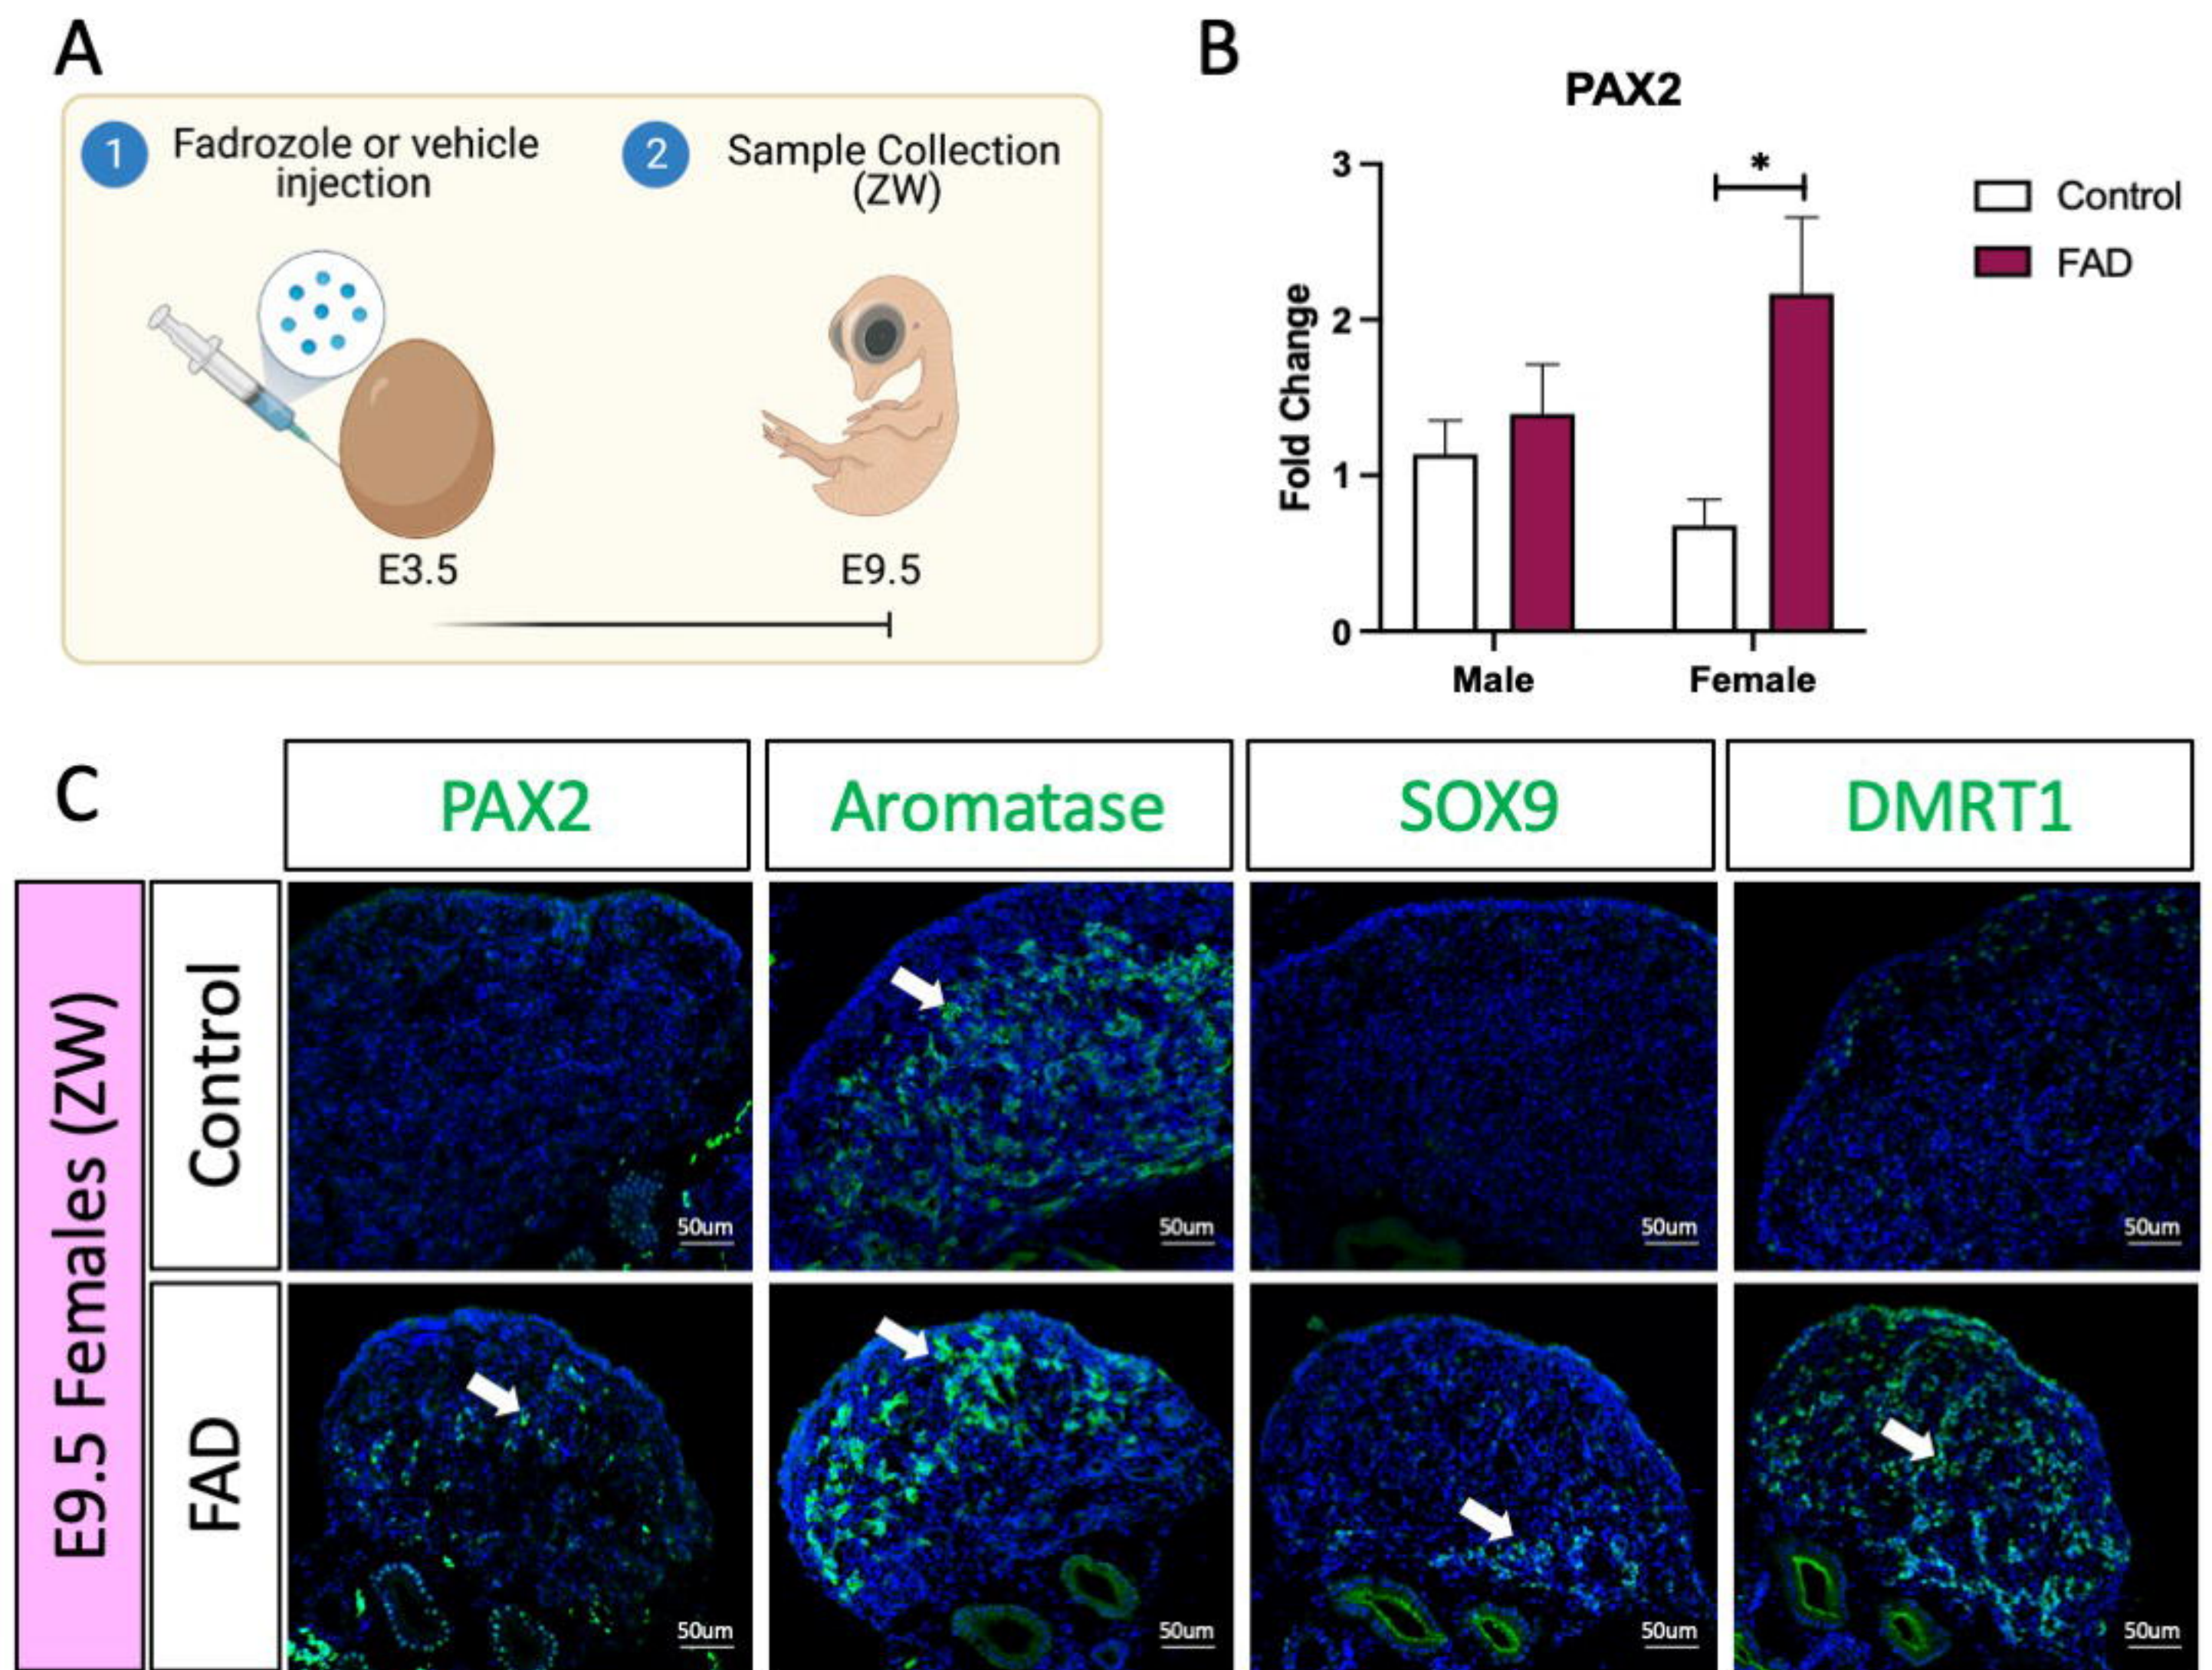



Fig 2

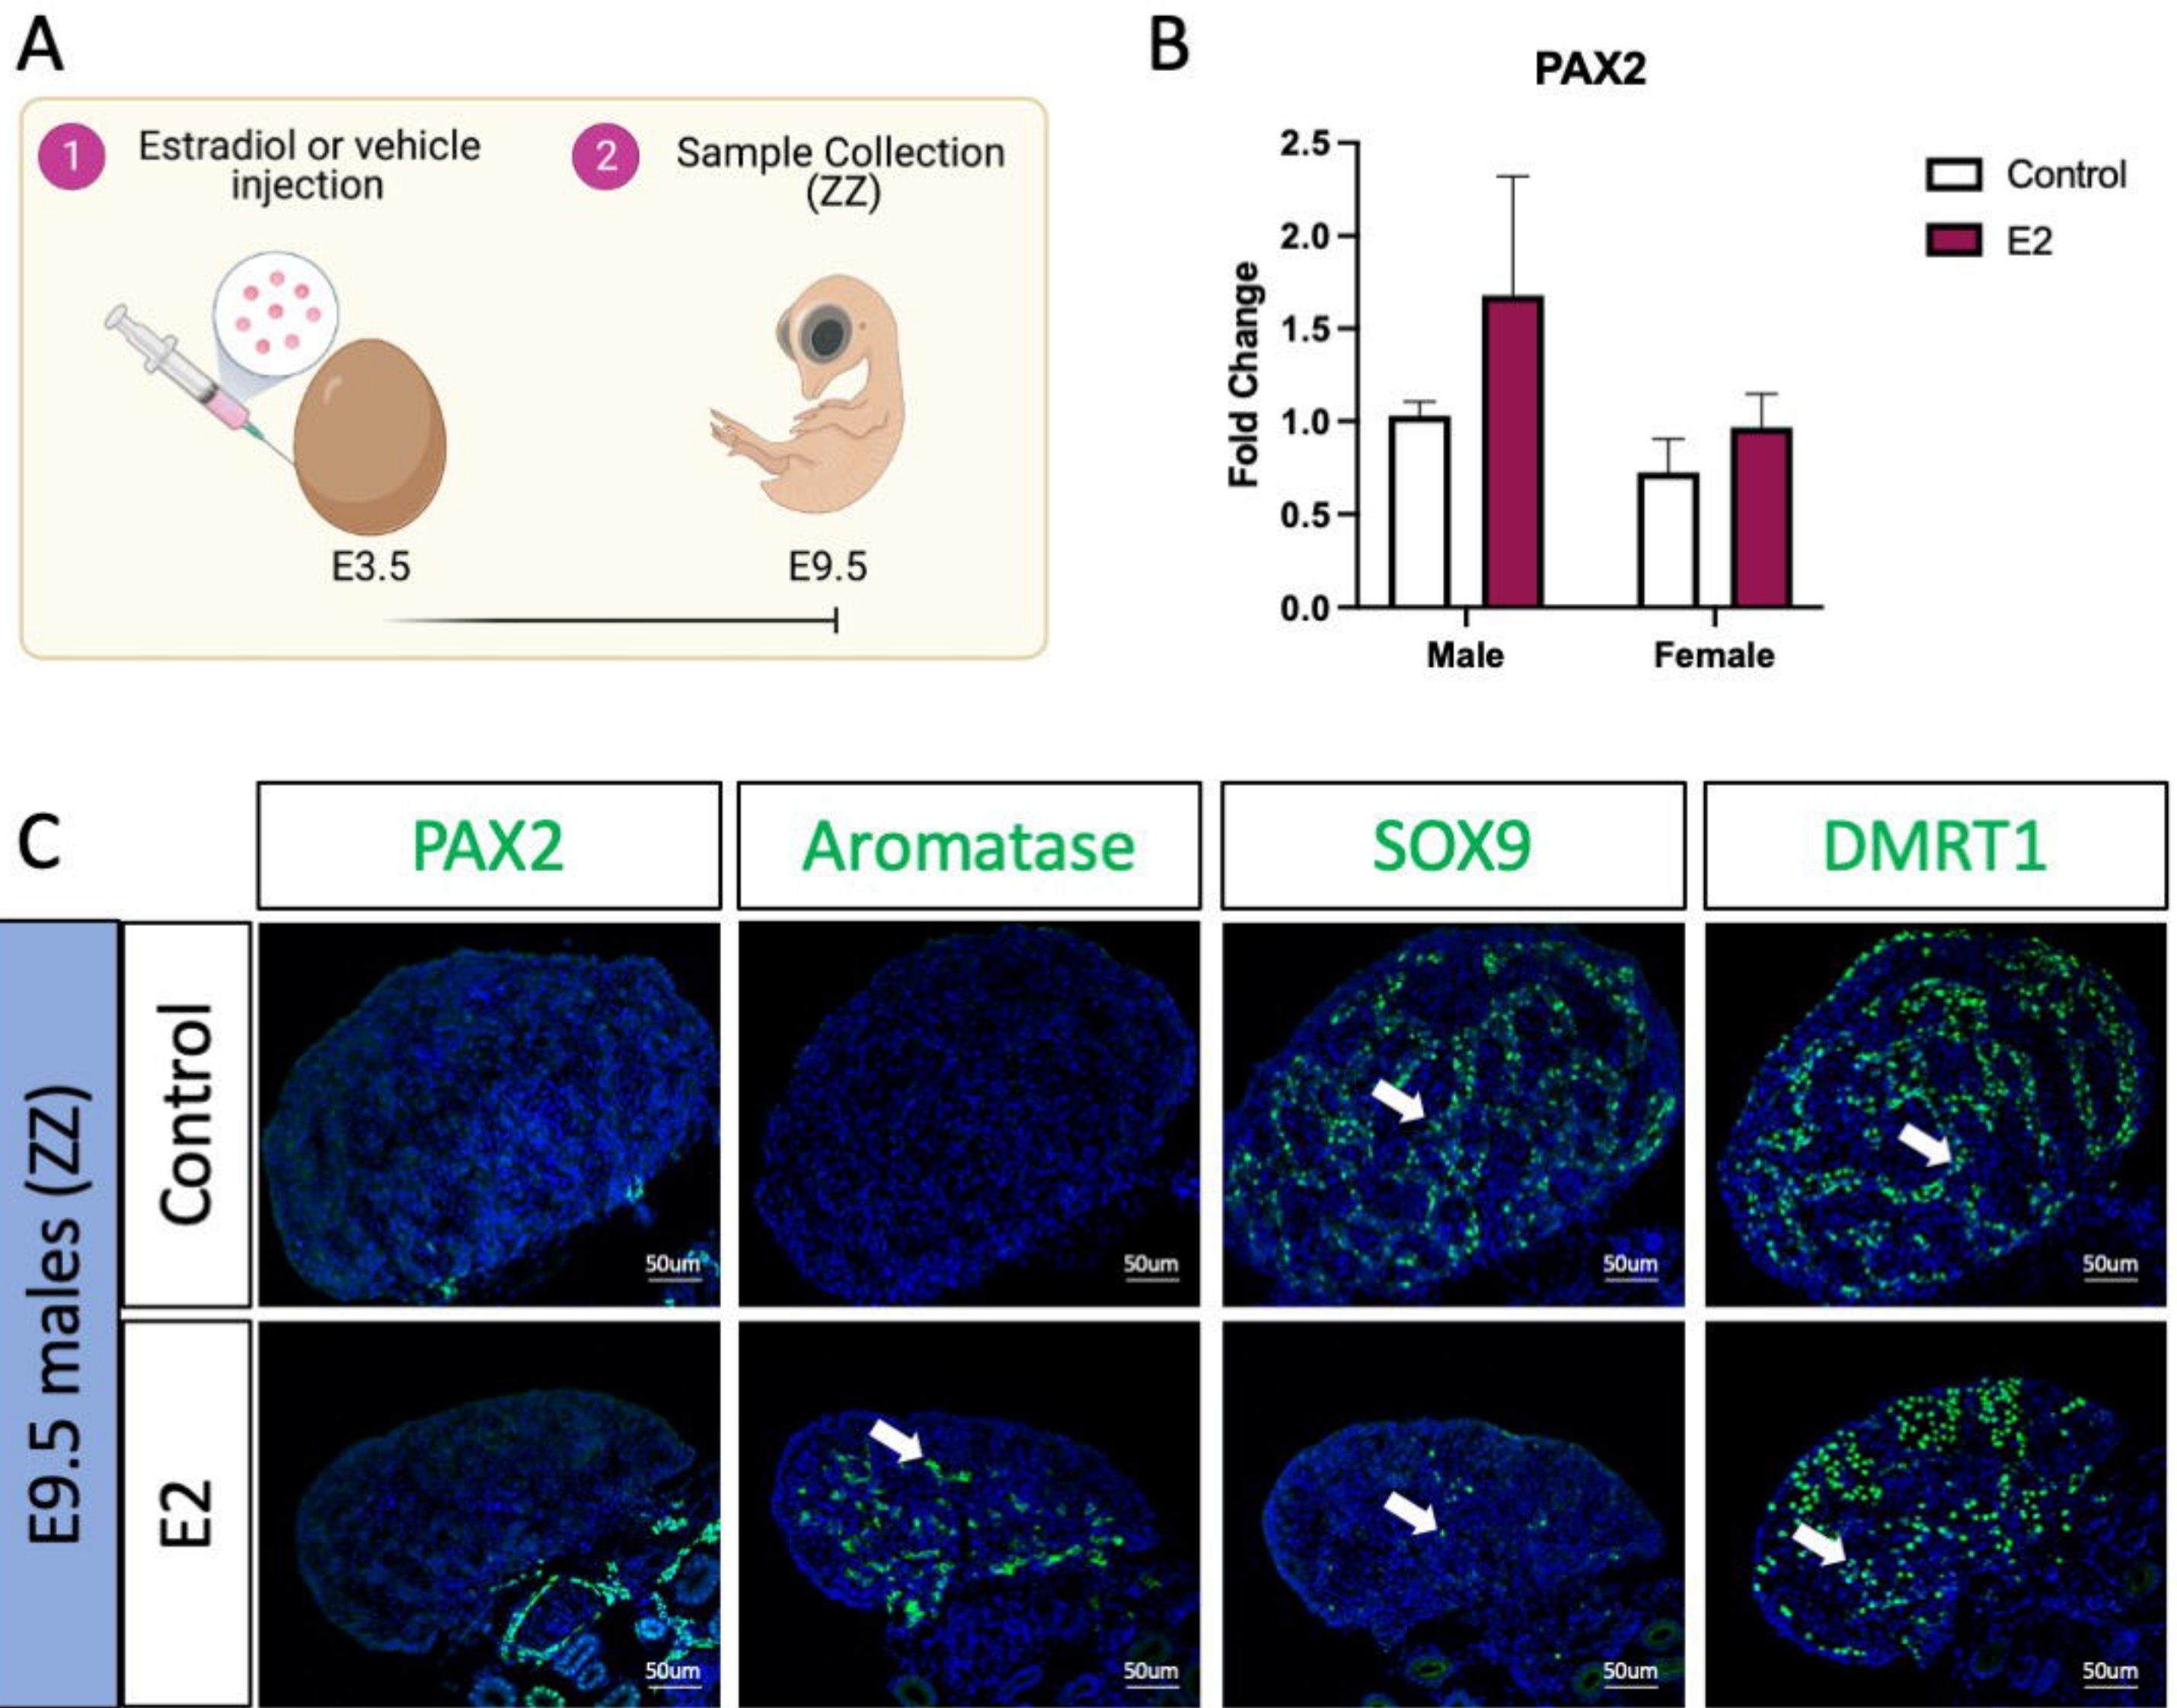

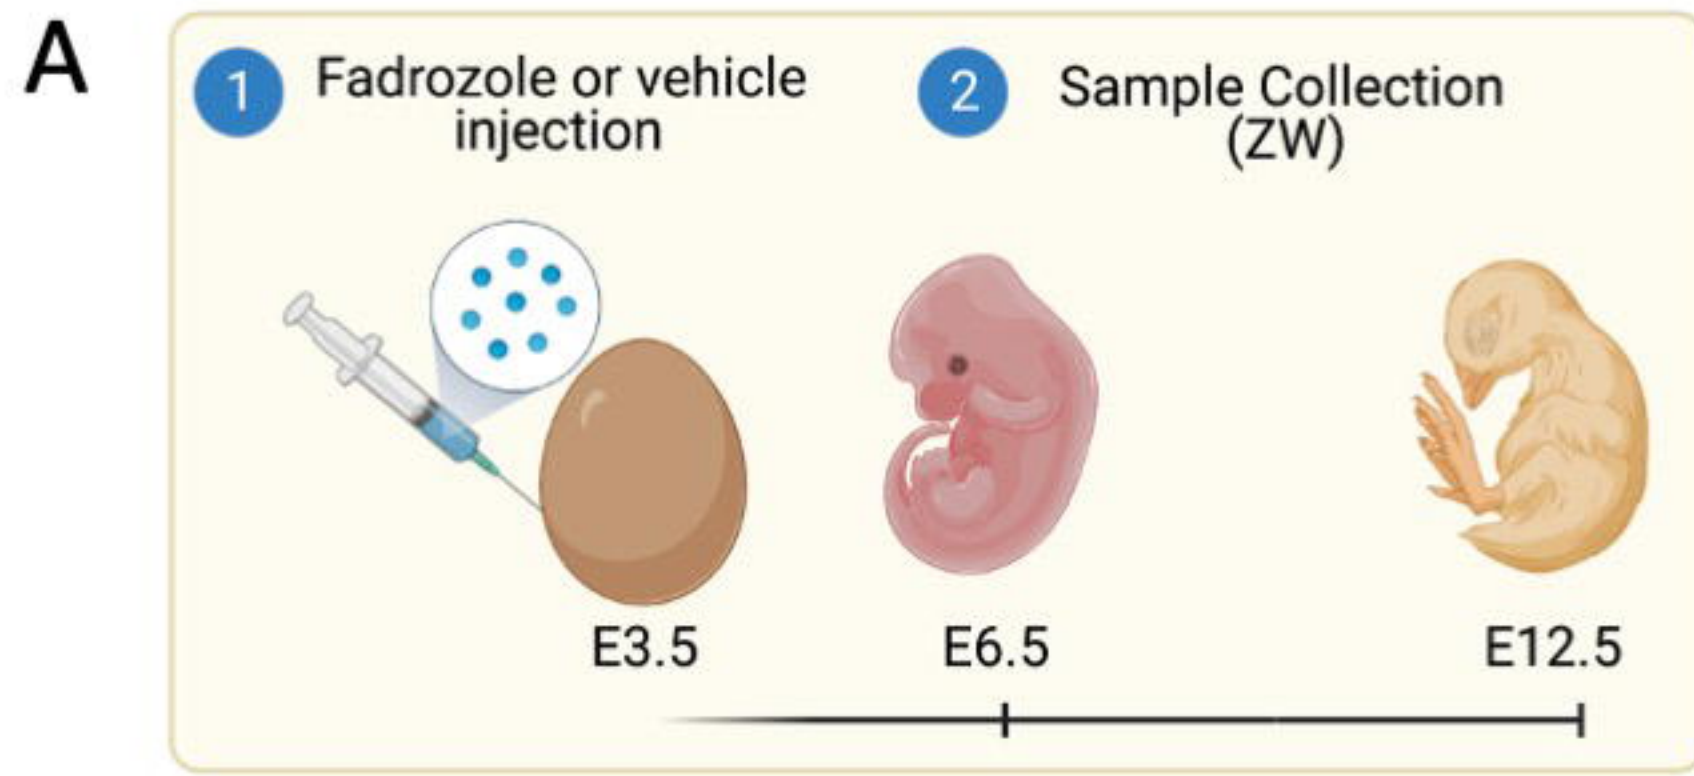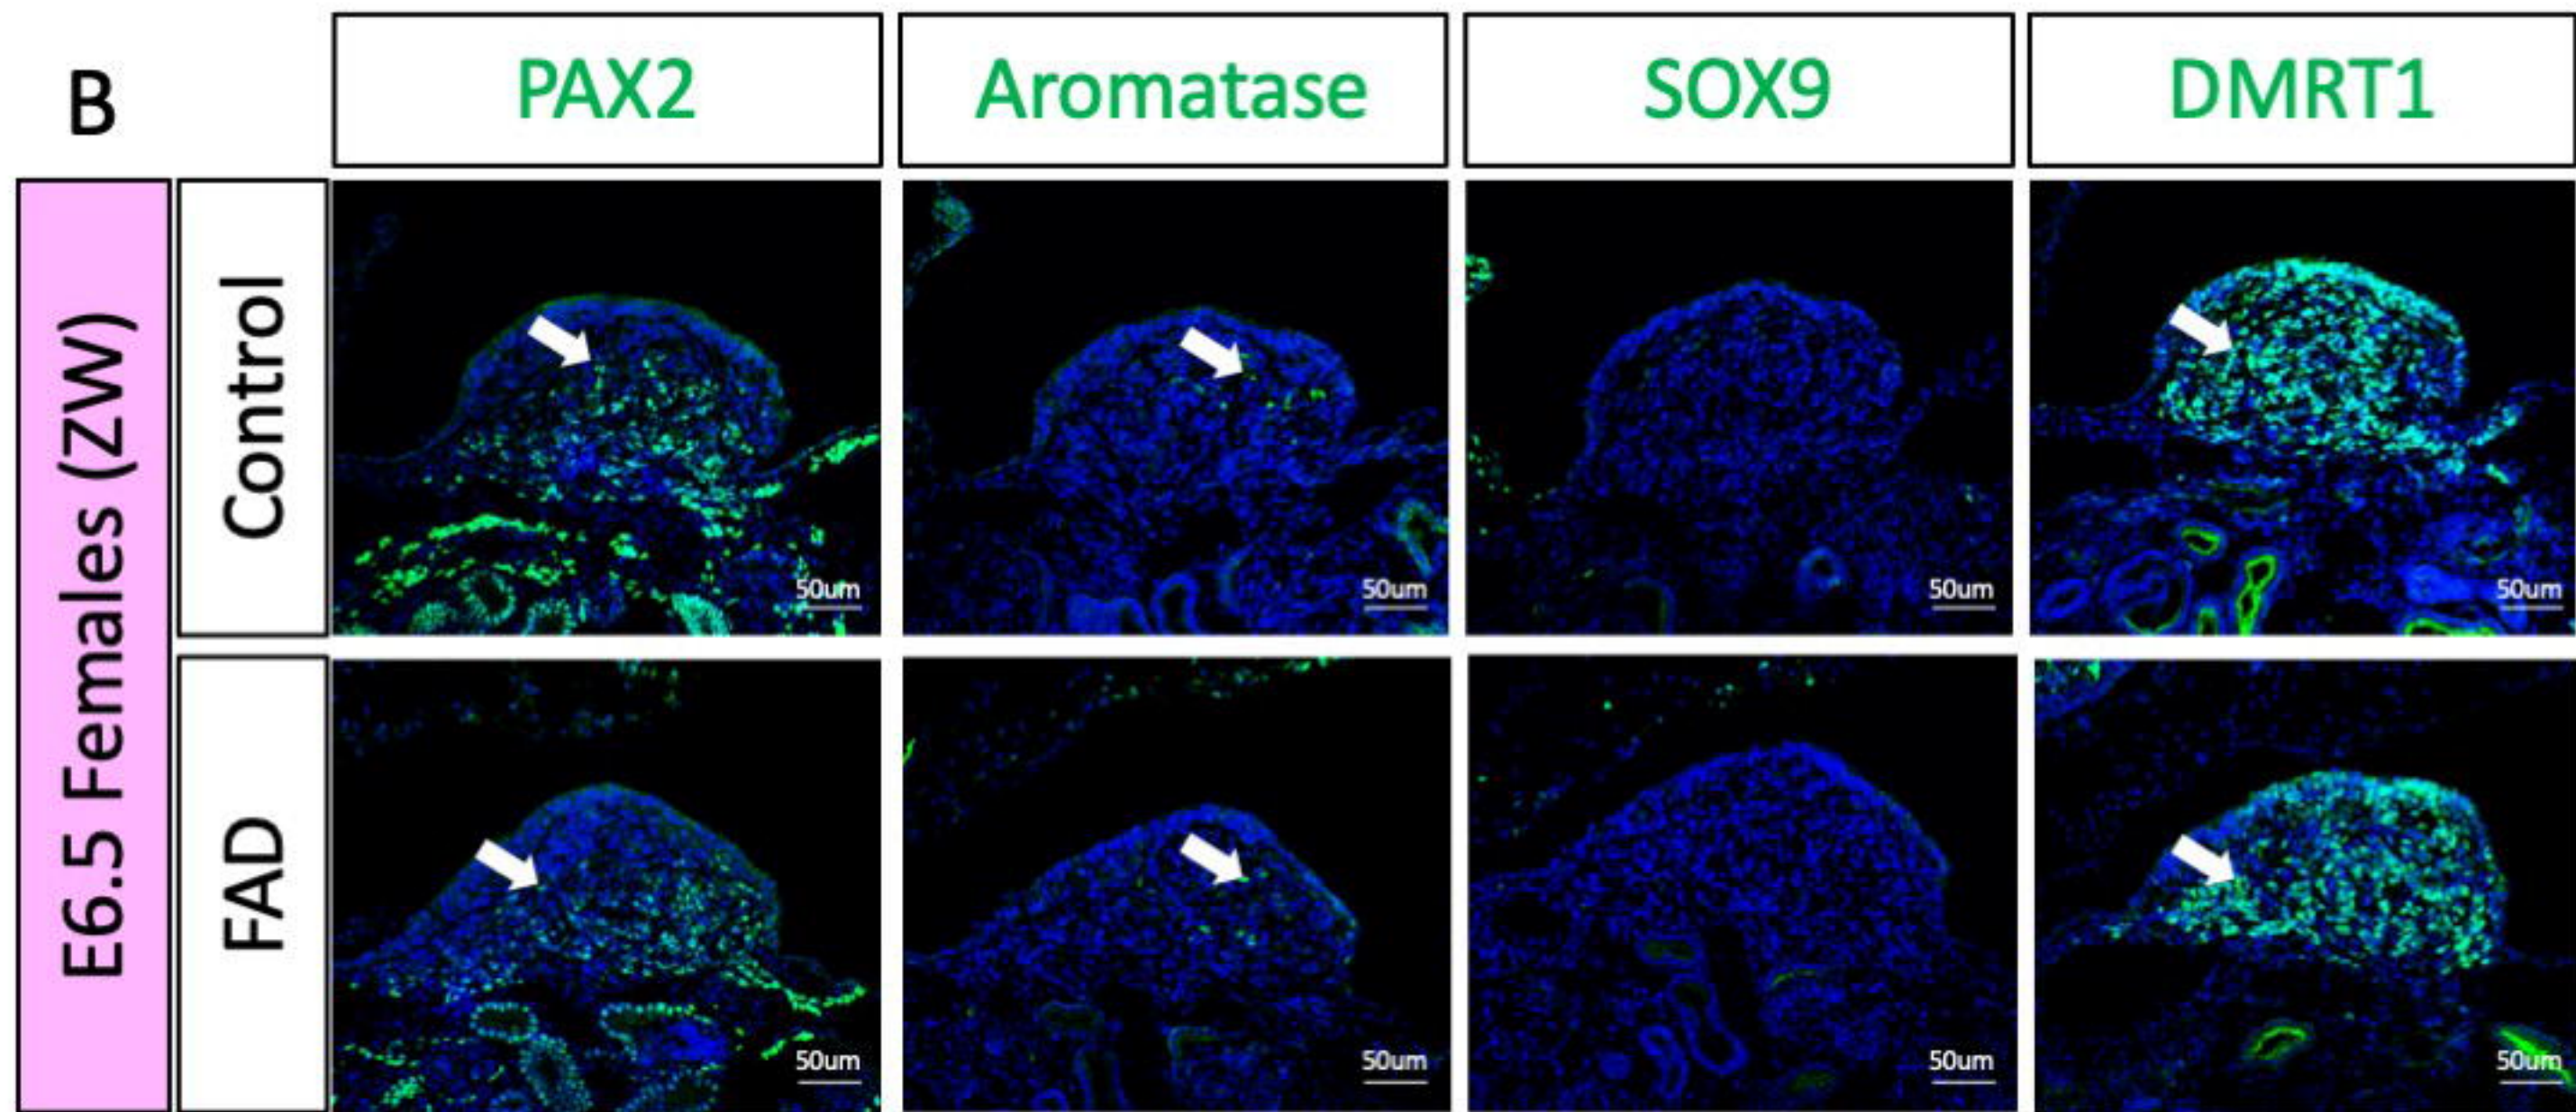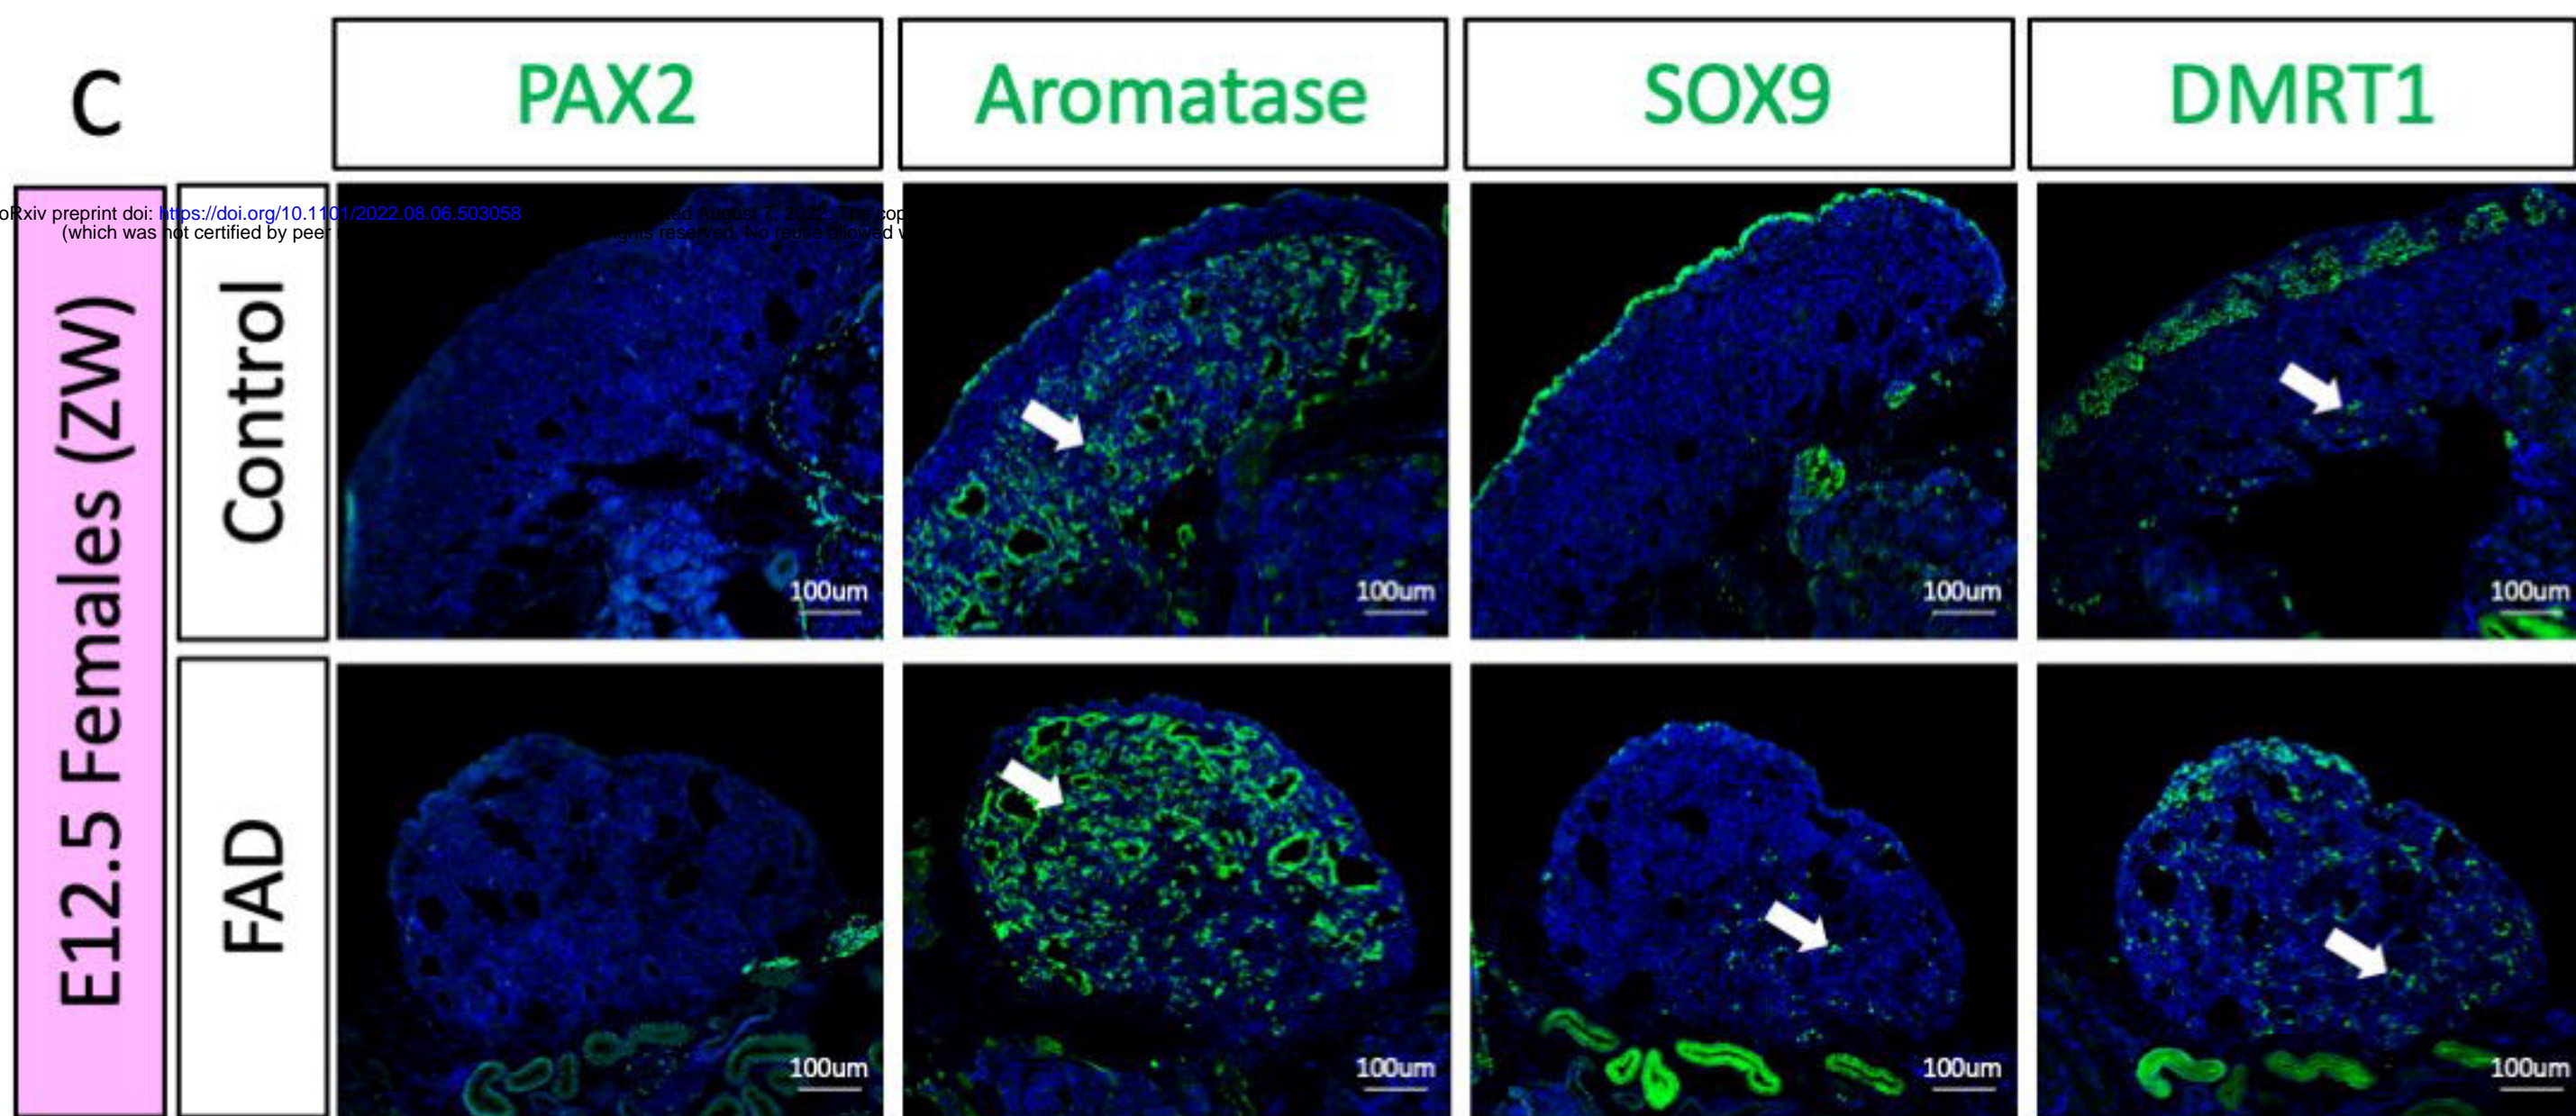

Fig 4

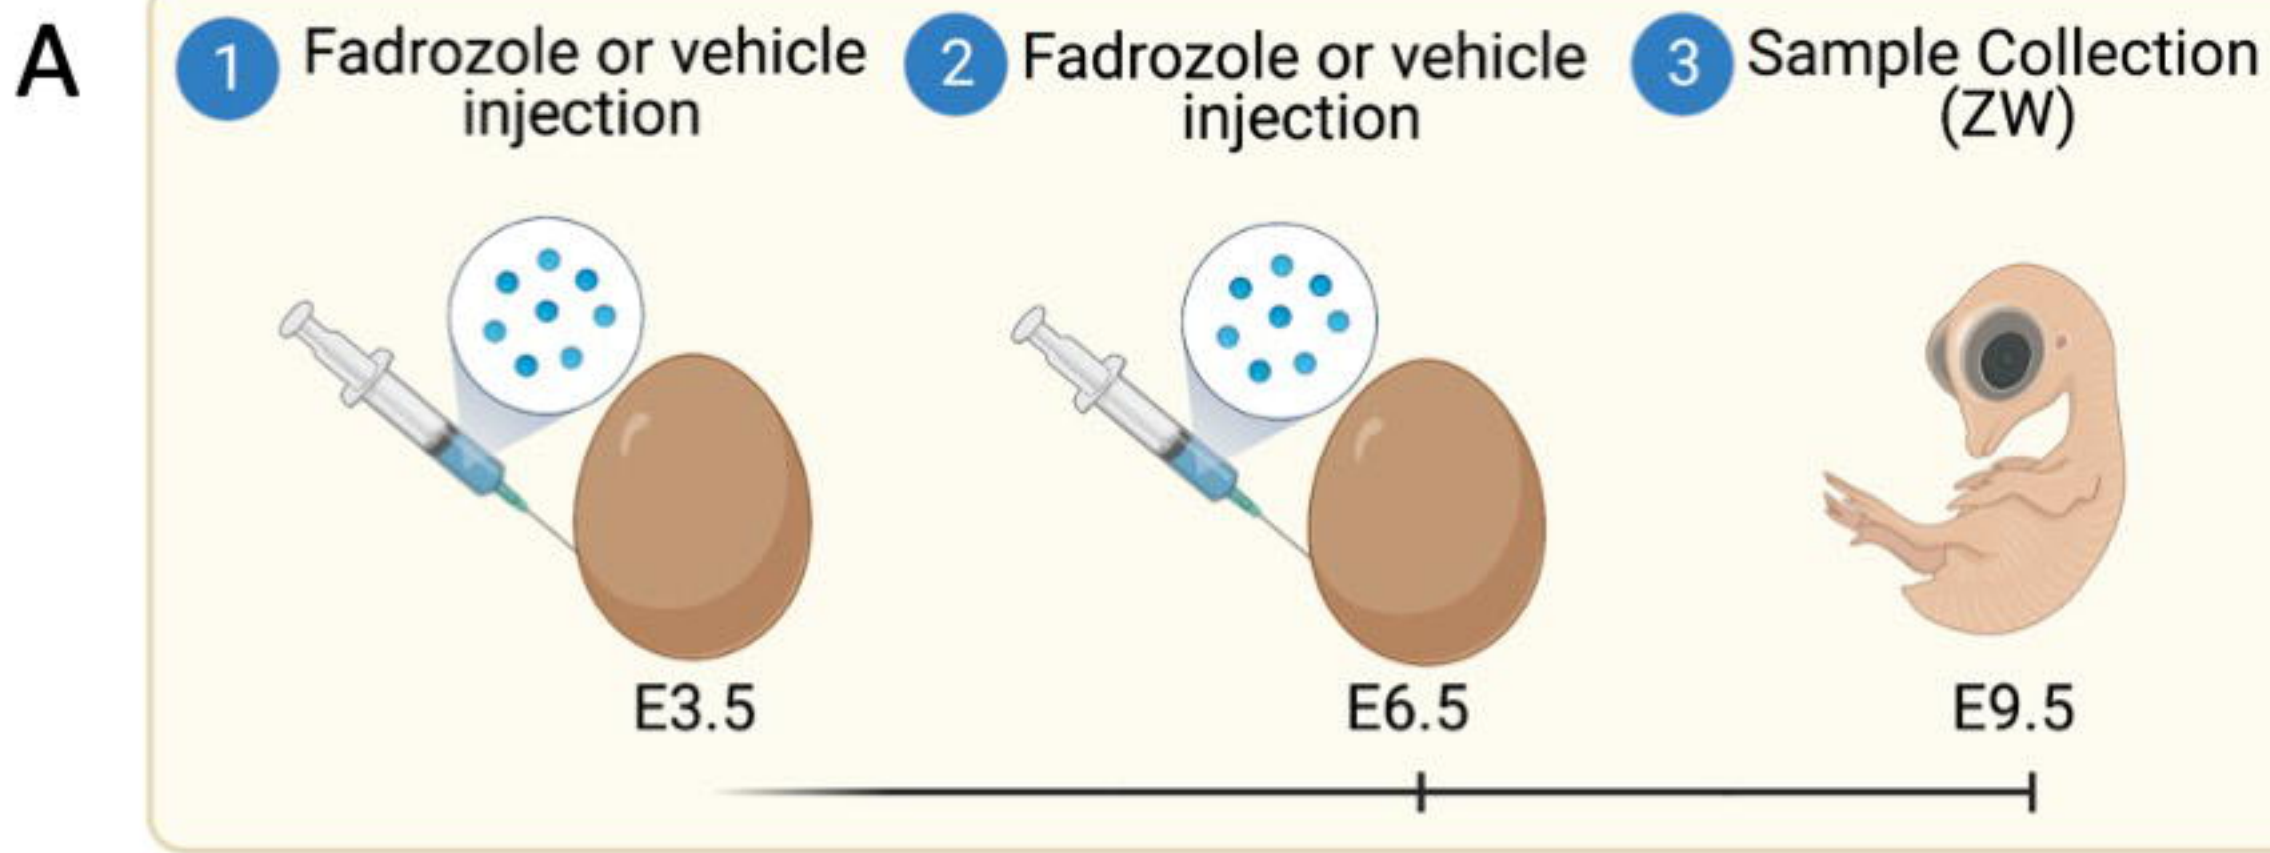

**B** E9.5 Females (ZW)

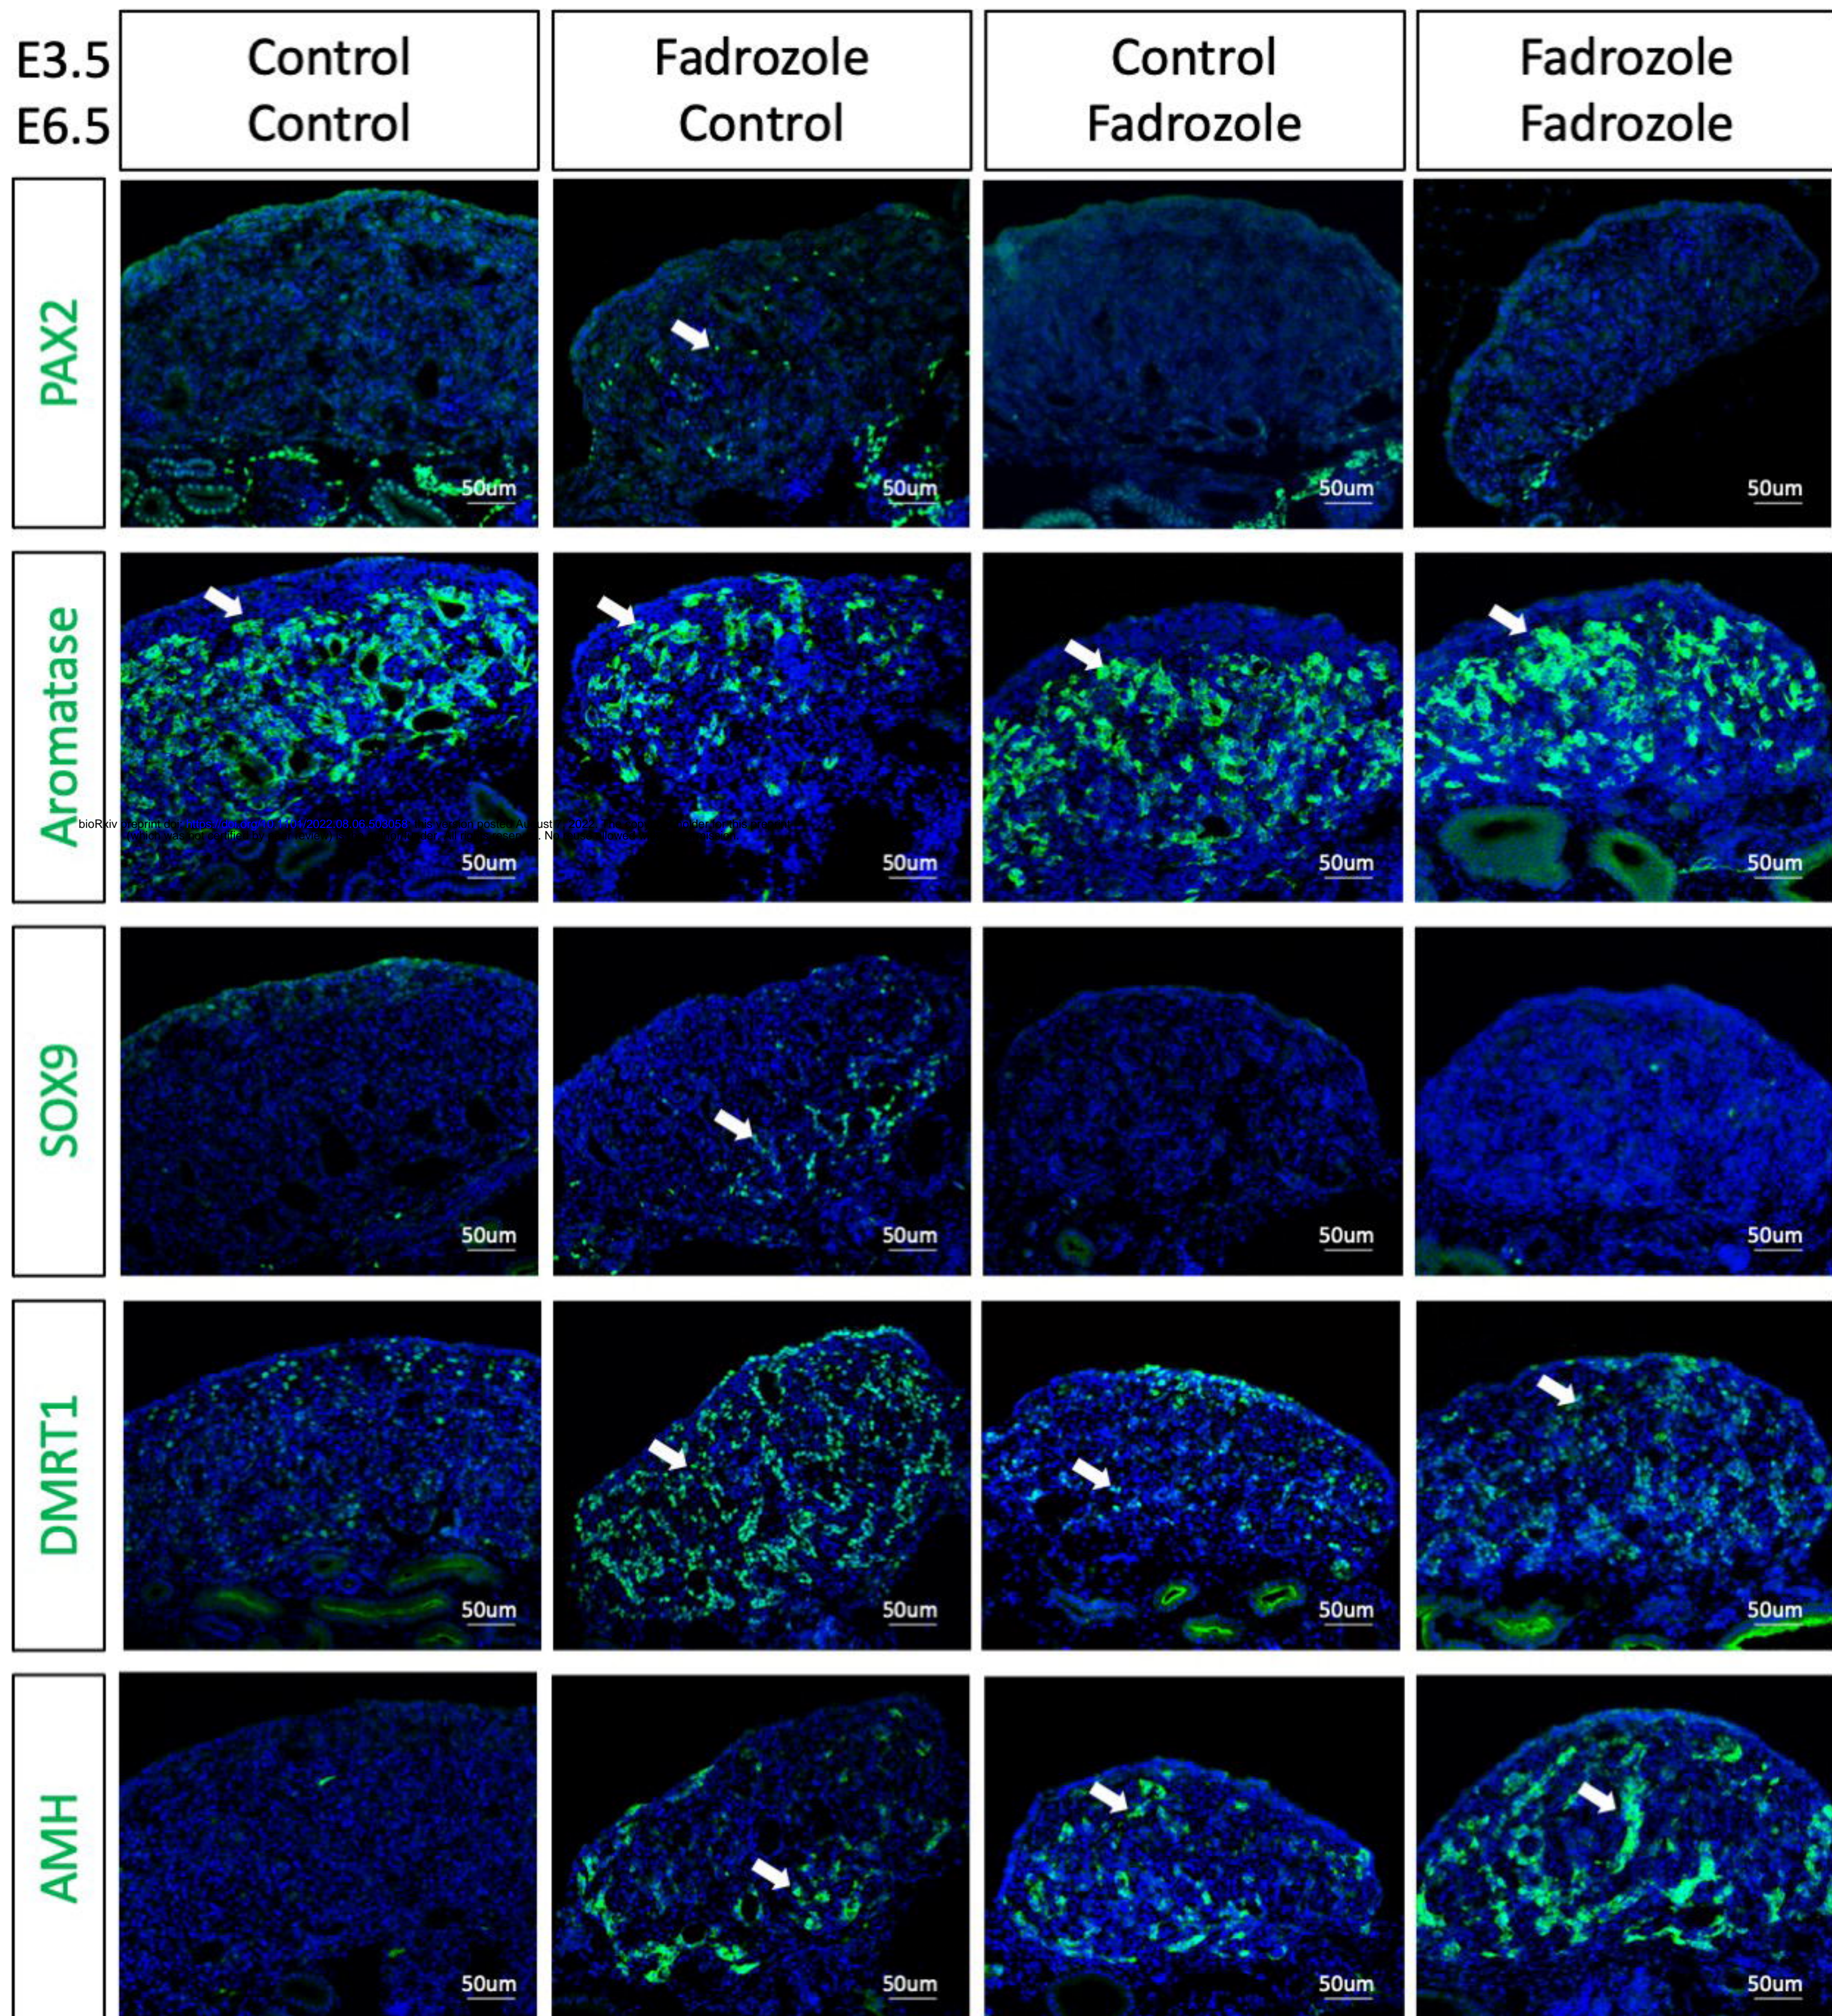

Source: https://www.biorxiv.org/content/10.1101/2022.08.06.503058v1.full.pdf
